# Supplementary material for: ALDH2 Suppresses Glycolysis in Hepatocellular Carcinoma via TRIM21-Mediated GLUT1 Degradation
Source: Research Square preprint supplement (doi:10.21203/rs.3.rs-7102103/v1), 2025-08-11
Supplement: Supplementary file 1 [file 6776cdb9277148dde058b380.docx]

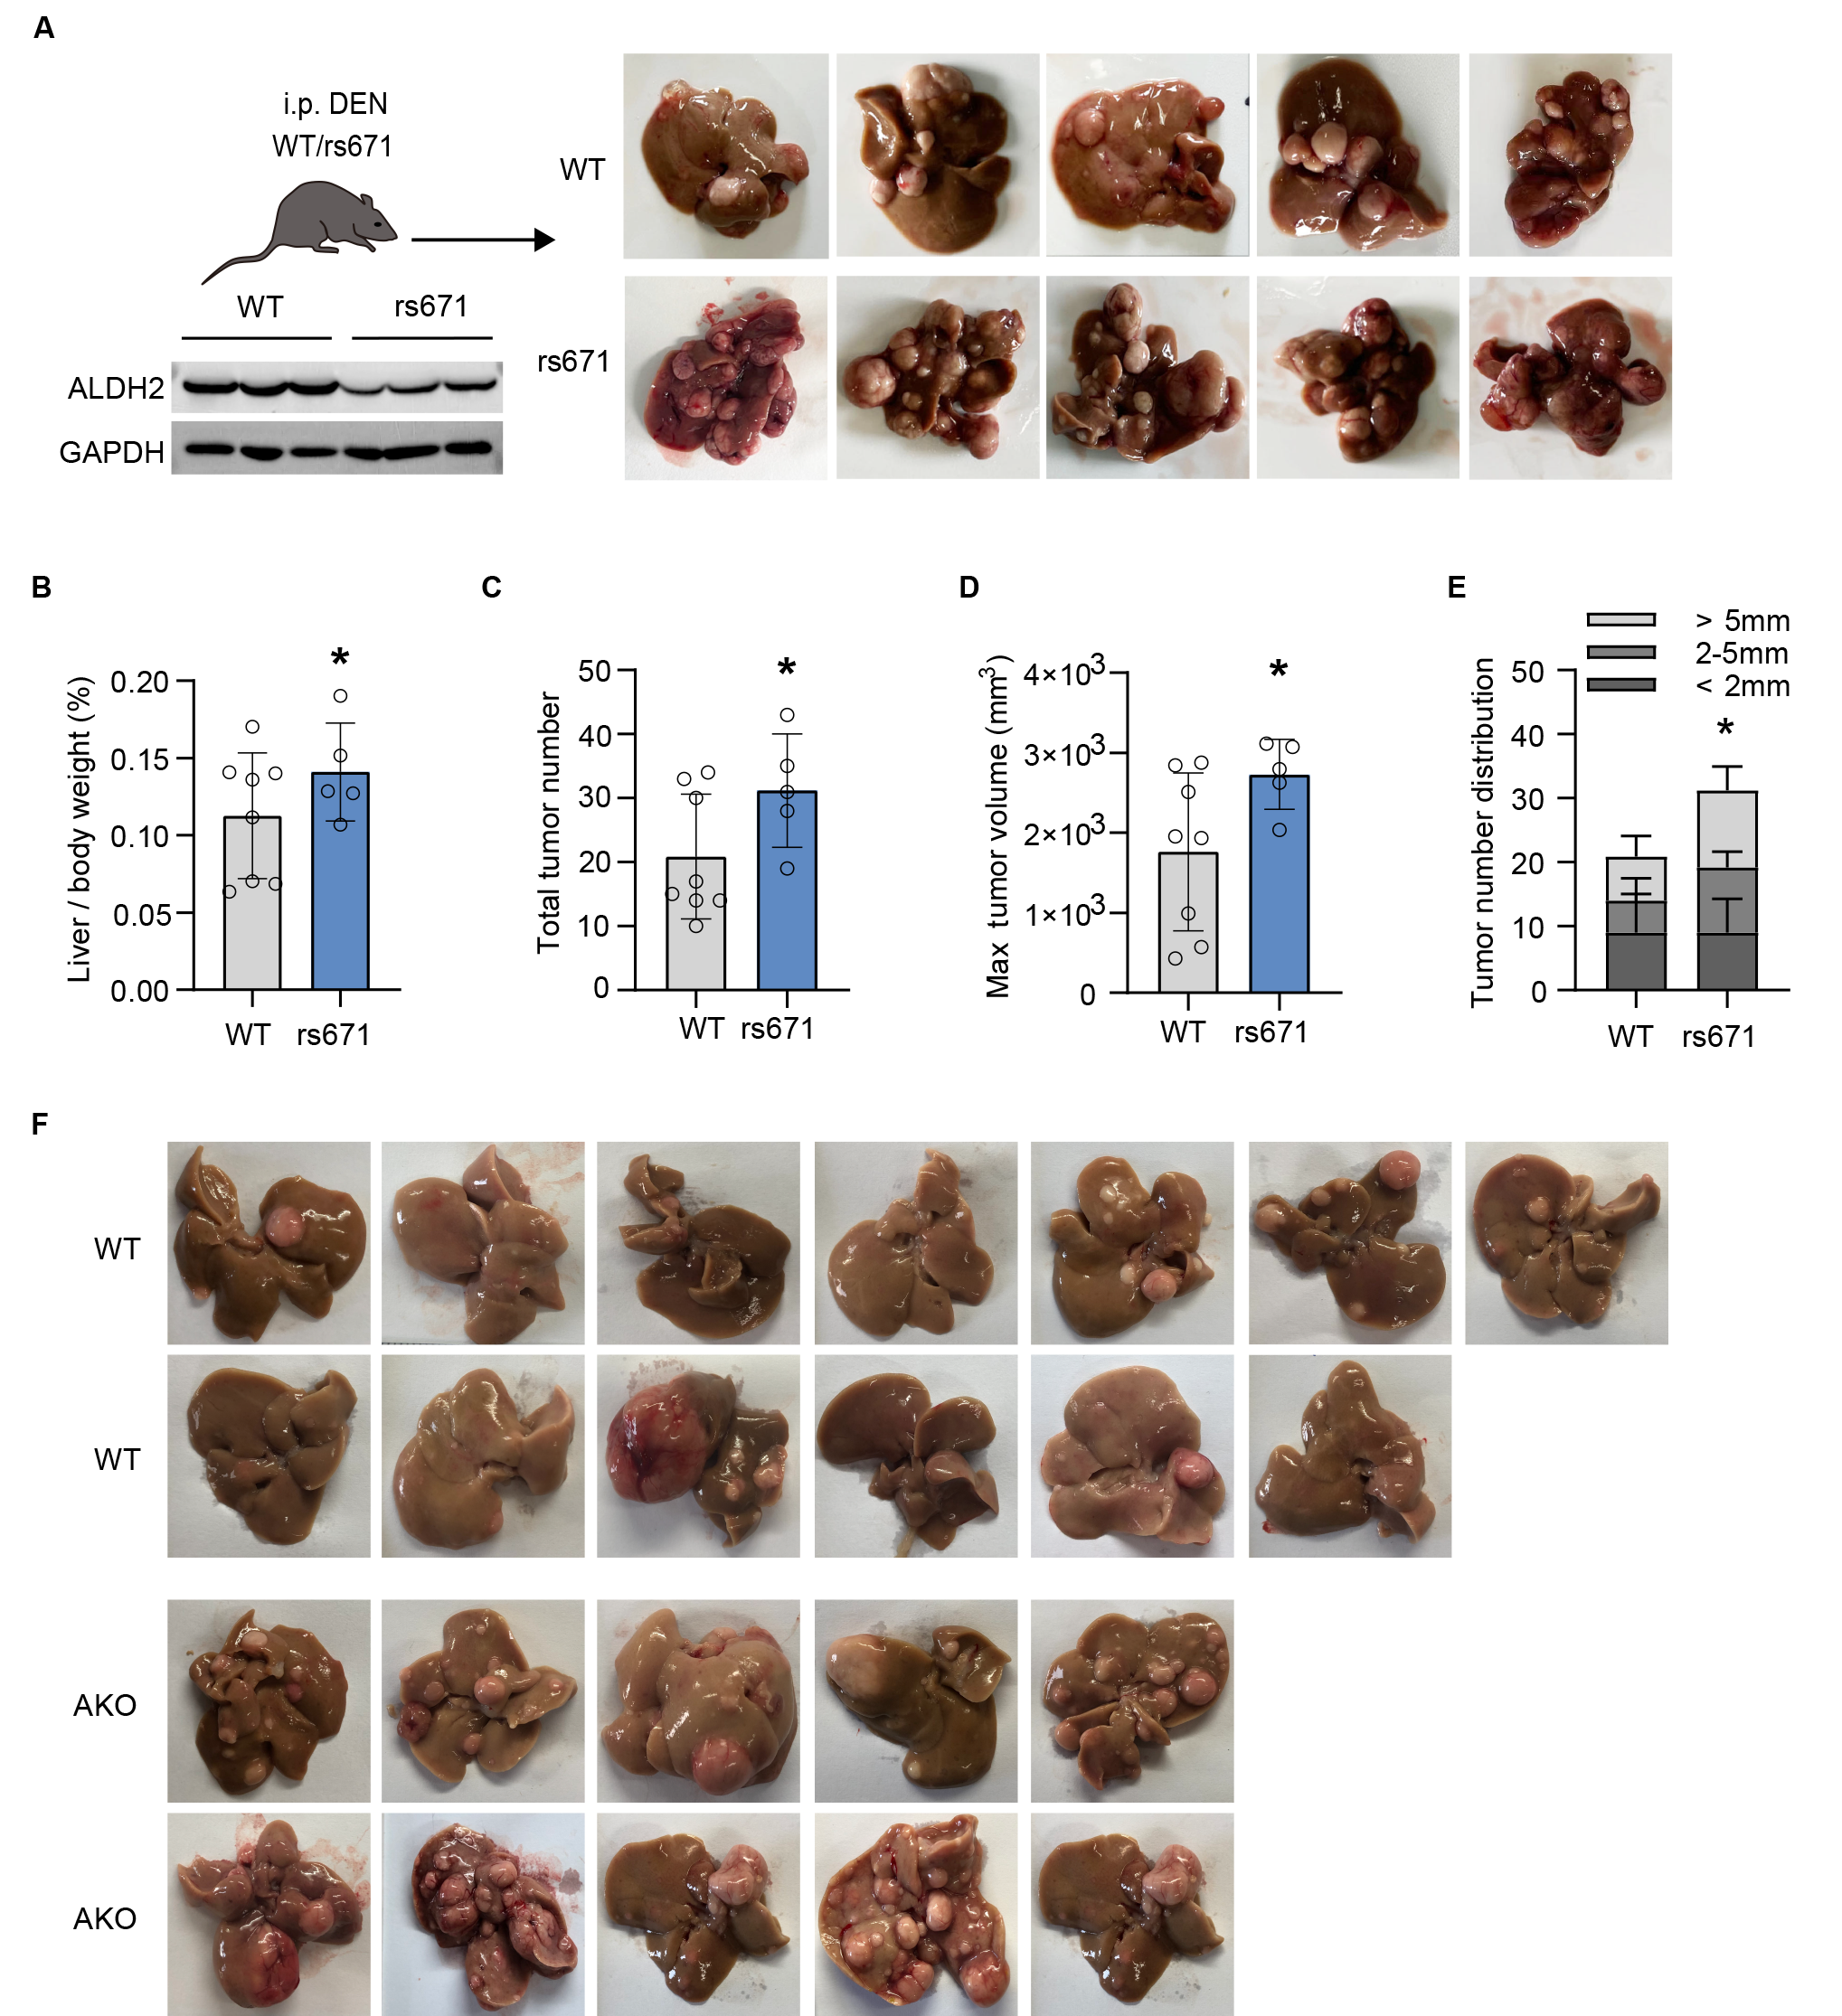


**Supplemental Figure 1. The ALDH2 rs671 variant enhances hepatocarcinogenesis in a DEN-induced HCC model**

**(A)** Schematic diagram of the DEN-induced HCC model. Wild-type (WT) and ALDH2 rs671 knock-in (rs671) mice were injected with 50ug/g DEN at 2 weeks of age and sacrificed at 37th week (left). Representative images of liver morphology from WT (5 of 8 mice shown) and rs671 (5 of 5 mice shown) groups are presented. ALDH2 protein expression in liver tissues was assessed by immunoblotting. GAPDH served as a loading control. **(B-E)** Quantification of liver-to-body weight ratio (B), total number of visible surface tumors (C), maximum tumor volume(D) and tumor number distribution (E) in WT (n = 8) and AKO (n = 5) mice. **(F)** Images of livers from WT and ALDH2 knockout (AKO) mice at 37 weeks post-DEN injection. Each image represents an individual mouse liver. Statistical comparisons were performed using two-tailed Student’s t test. All data are presented as mean ± SD.*p < 0.05.


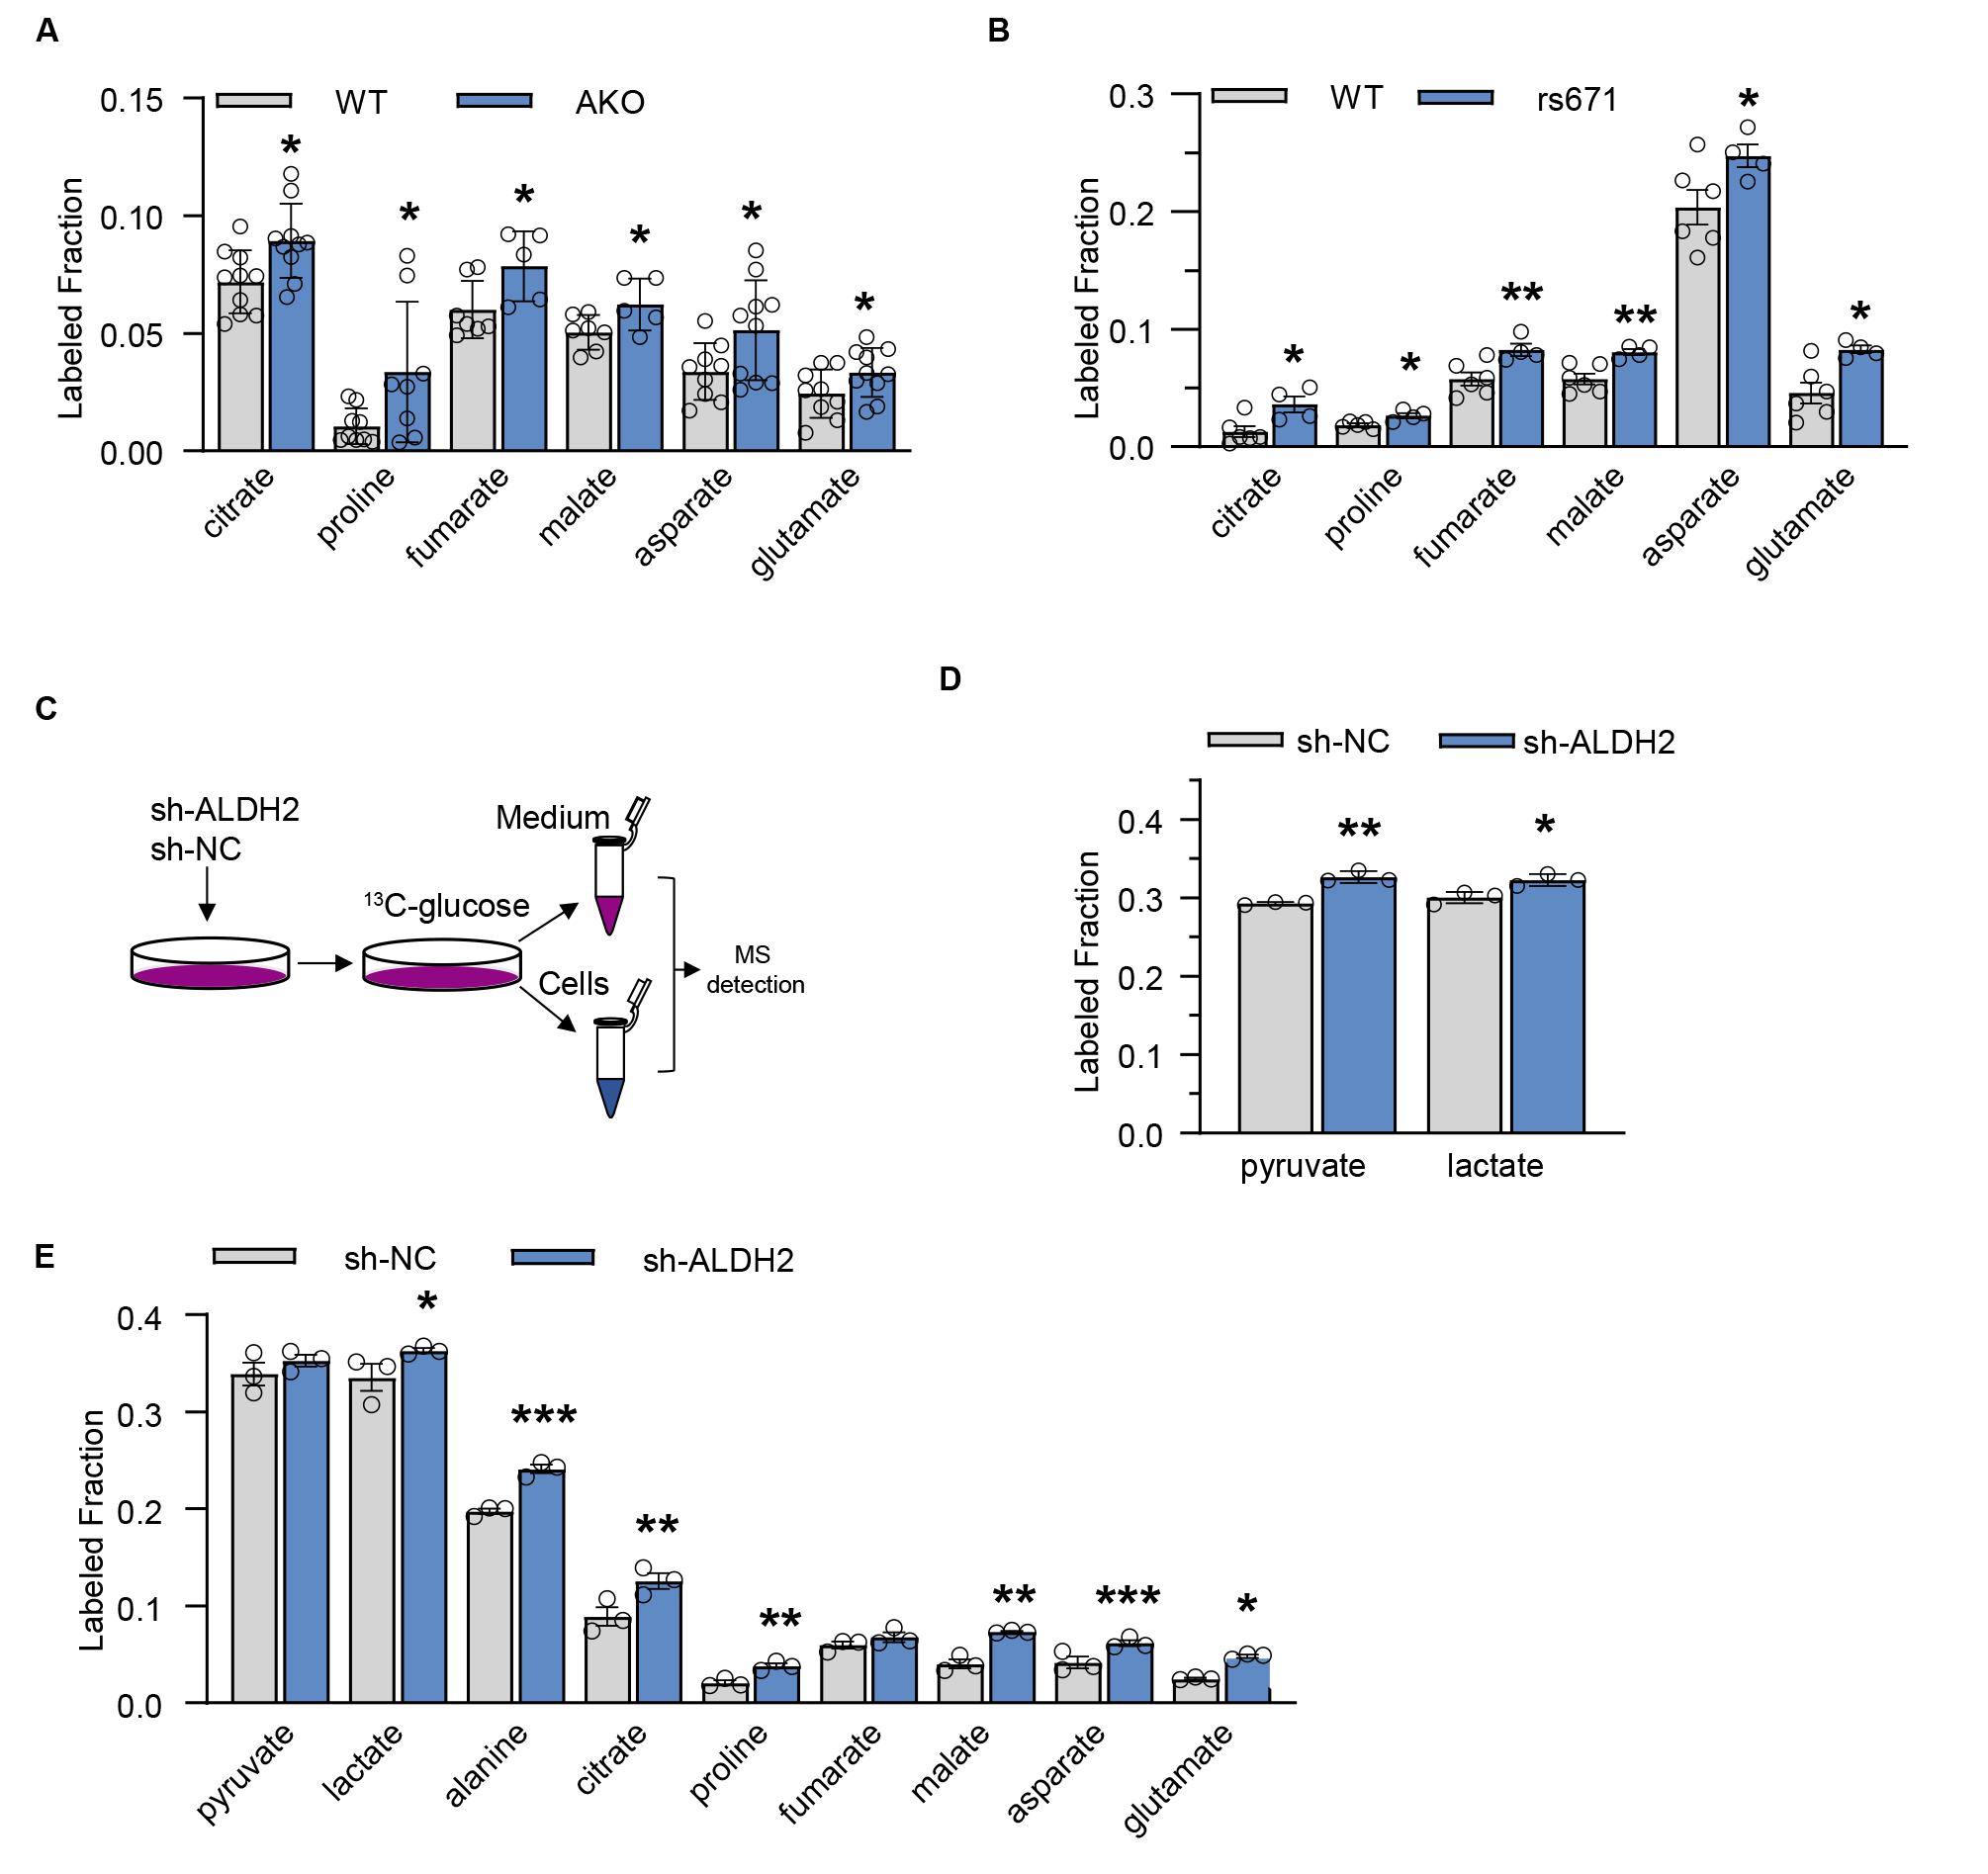


**Supplemental Figure 2.** **ALDH2 deficiency promotes glucose metabolism in vivo and in vitro**

**(A–B)** Fractional enrichment of ¹³C-labeled TCA cycle intermediates and associated amino acids—including citrate, proline, fumarate, malate, aspartate, and glutamate—in liver tissues from WT and ALDH2 knockout (AKO) mice (A), and WT and ALDH2 rs671 knock-in mice (B) following [U-¹³C₆]-glucose tail vein injection. **(C) S**chematic of in vitro [U-¹³C₆]-glucose tracing in HCC cells transduced with control (sh-NC) or ALDH2 knockdown (sh-ALDH2) constructs. Culture media and cells were collected after labeling for mass spectrometry–based isotopic analysis. **(D)** Fractional enrichment of ¹³C-labeled pyruvate and lactate in the culture medium of sh-NC and sh-ALDH2 HCC cells. **(E) I**ntracellular ¹³C-labeling of glycolytic and TCA cycle–related metabolites—including pyruvate, lactate, alanine, citrate, proline, fumarate, malate, aspartate, and glutamate—in sh-NC and sh-ALDH2 cells cultured with [U-¹³C₆]-glucose.Statistical comparisons were performed using two-tailed Student’s *t*-test. Data are presented as mean ± SD. *p < 0.05, **p < 0.01, ***p < 0.001.

**
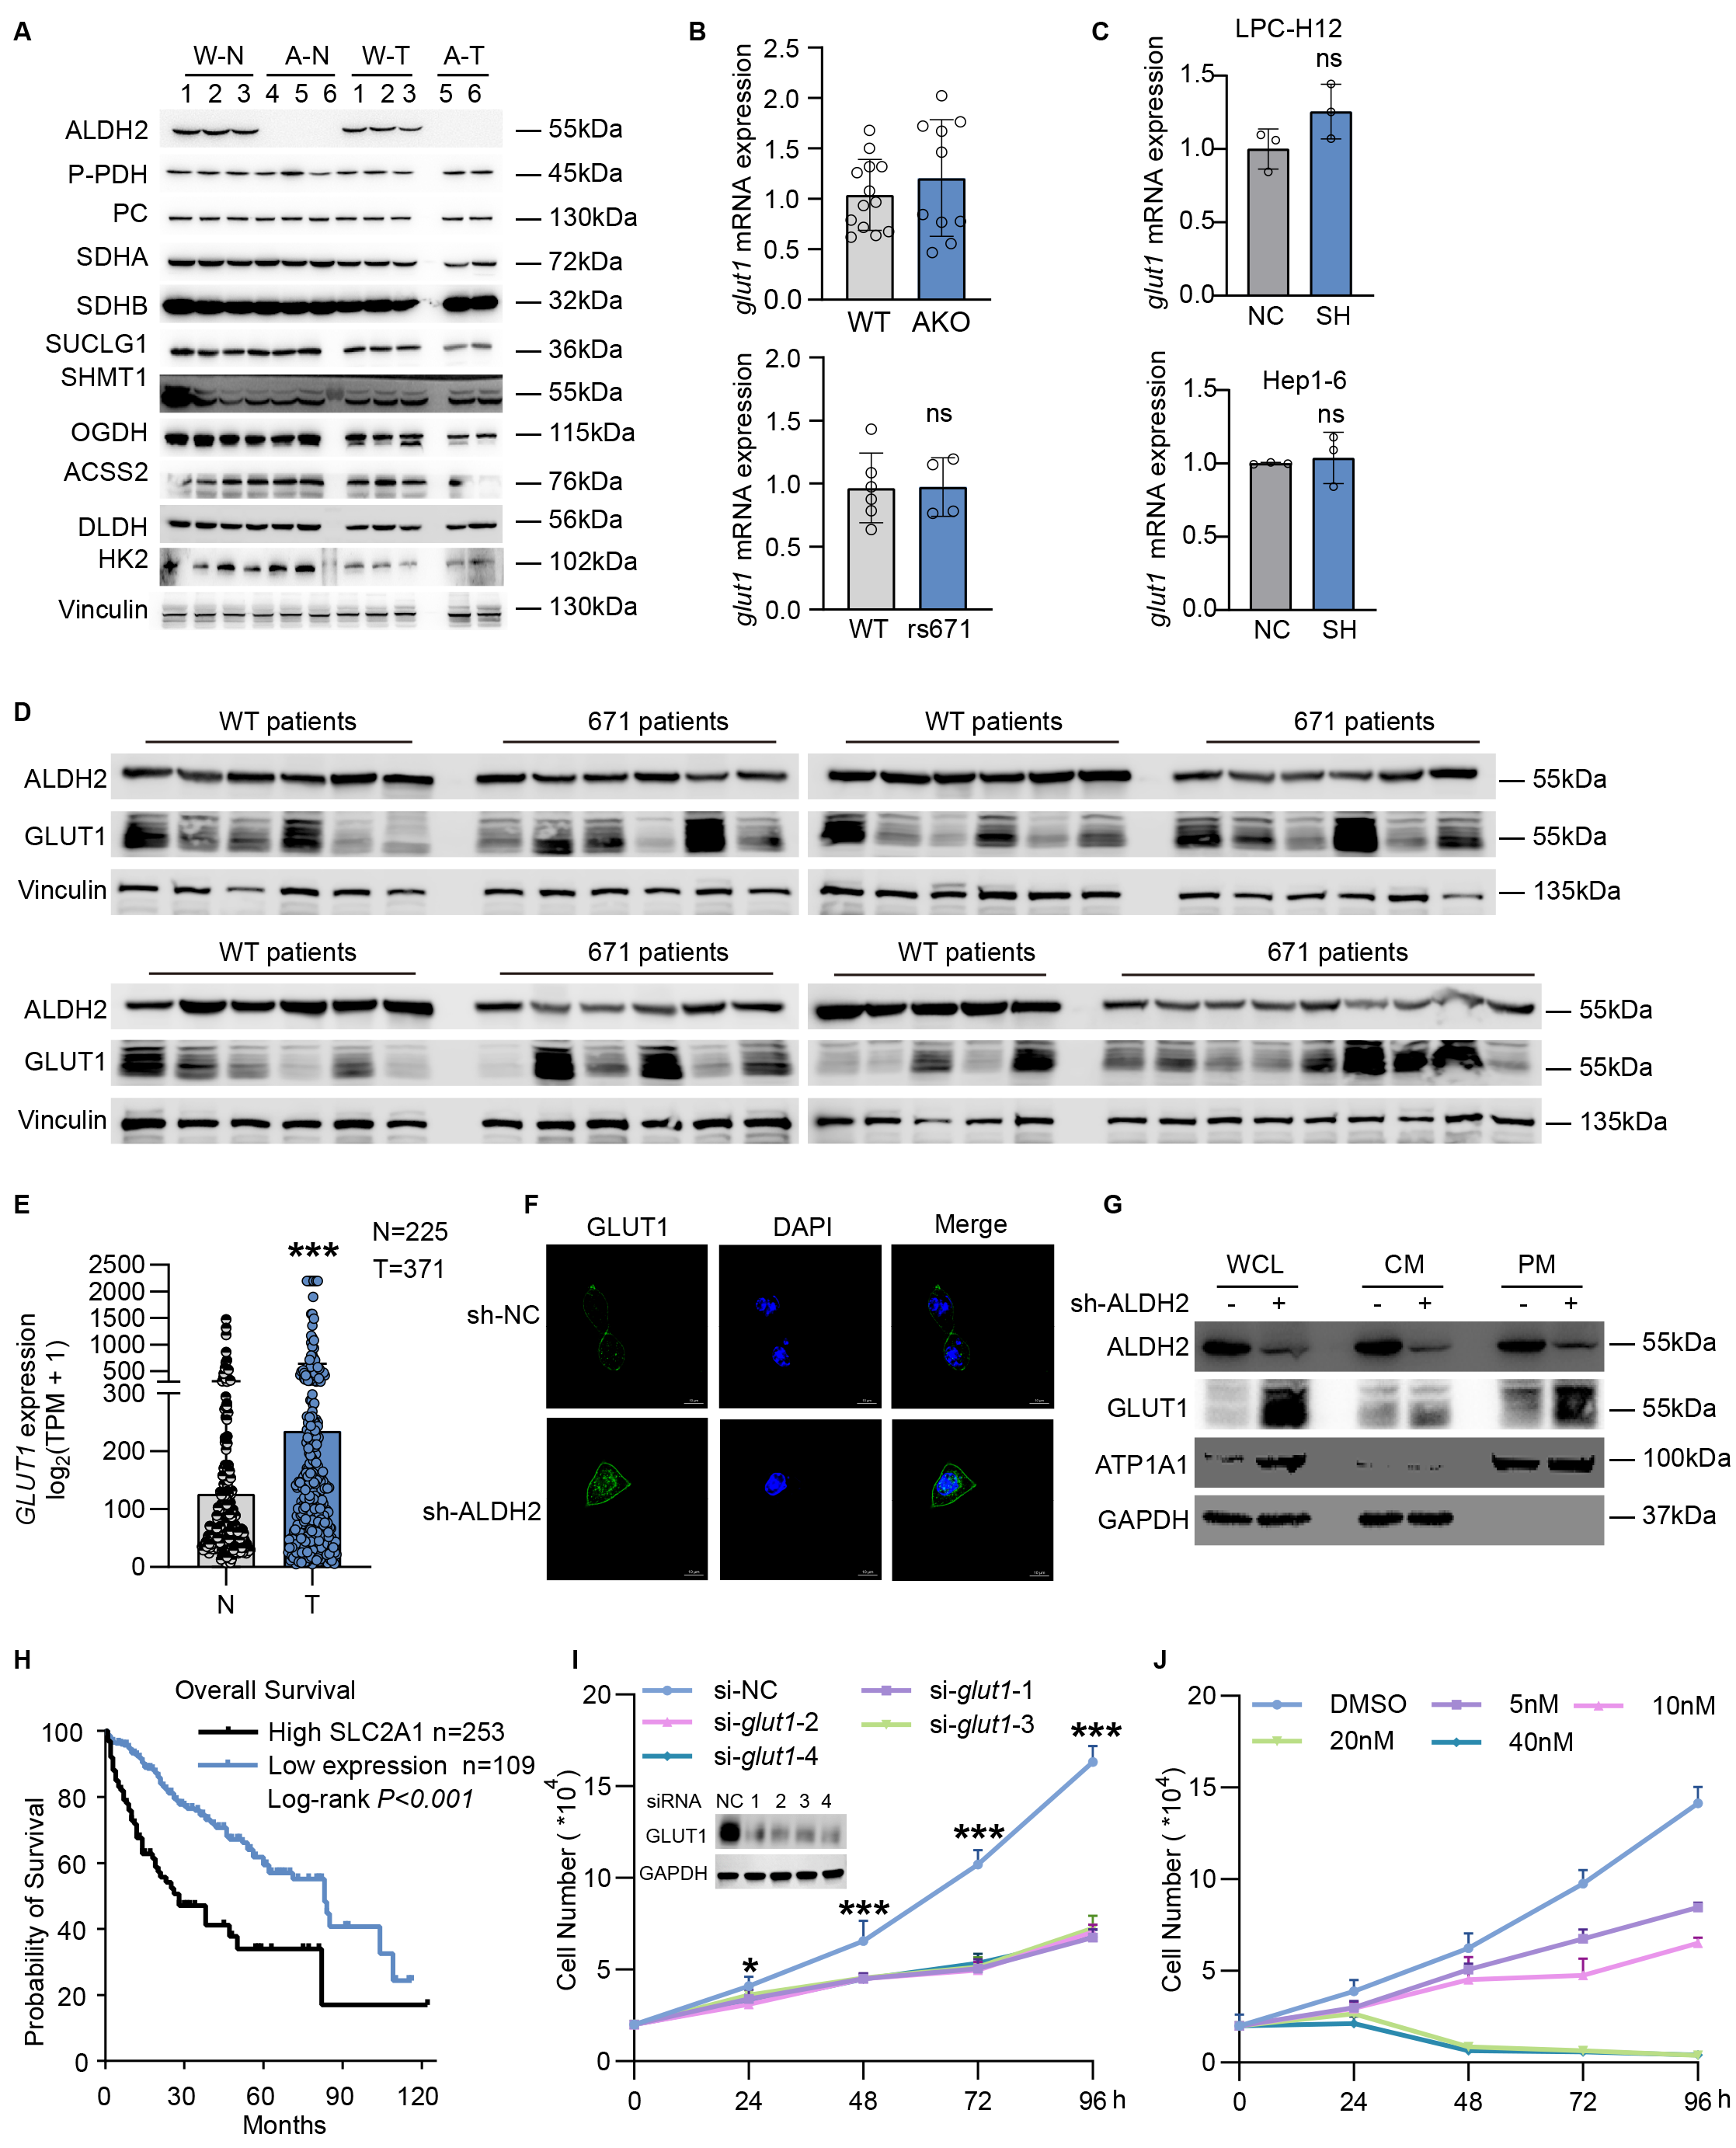
**

**Supplemental Figure 3. ALDH2 loss increases GLUT1 protein stability and plasma membrane localization in HCC.**

**(A)** Immunoblot analysis of proteins related to glucose metabolism in liver and tumor tissues from wild-type (WT) and ALDH2 knockout (AKO) mice. **(B)** *Slc2a1* mRNA levels in liver tissues from WT, AKO, and ALDH2 rs671 knock-in mice, measured by qRT-PCR. **(C)** *Slc2a1* transcript levels in LPC-H12 and Hepa1-6 cells stably expressing sh-ALDH2 or control shRNA, analyzed by qRT-PCR. **(D)** Immunoblot analysis of ALDH2 and GLUT1 expression in tumor tissues from human HCC patients stratified by ALDH2 genotype (WT vs rs671), corresponding to Fig. 3D–E. **(E)**Analysis of *SLC2A1* mRNA expression in HCC tumors versus normal liver tissues using the TCGA-LIHC dataset (n = 225 tumors, n = 371 normal). **(F)** Immunofluorescence staining of endogenous GLUT1 cellular localization in LPC-H12 cells stably expressing sh-ALDH2 or control shRNA. Scale bar, 10uM. **(G)** Subcellular fractionation analysis of GLUT1 in LPC-H12 cells. Plasma membrane (PM) and intracellular membrane (ICM) fractions were analyzed by immunoblotting. ATP1A1 and GAPDH served as PM and cytosolic markers, respectively; WCL, whole cell lysate. **(H)** Kaplan–Meier overall survival of HCC patients stratified by high versus low GLUT1 expression using the GEPIA platform (TCGA-LIHC cohort). **(I)** GLUT1 knockdown reduces cell proliferation. LPC-H12 parental cells were transfected with four independent siRNAs targeting GLUT1 (si-glut1-1 to si-glut1-4) or negative control (si-NC). Cell numbers were quantified at indicated time points. Representative immunoblot shows knockdown efficiency. **(J)** Dose-dependent inhibition of cell proliferation by the selective GLUT1 inhibitor BAY-876. LPC-H12 cells were treated with the indicated concentrations of BAY-876 or DMSO. Cell numbers were measured over 96 hours. Statistical comparisons were performed using a two-tailed Student’s *t*-test. Data are presented as mean ± SD. *p < 0.05, **p < 0.01, ***p < 0.001.


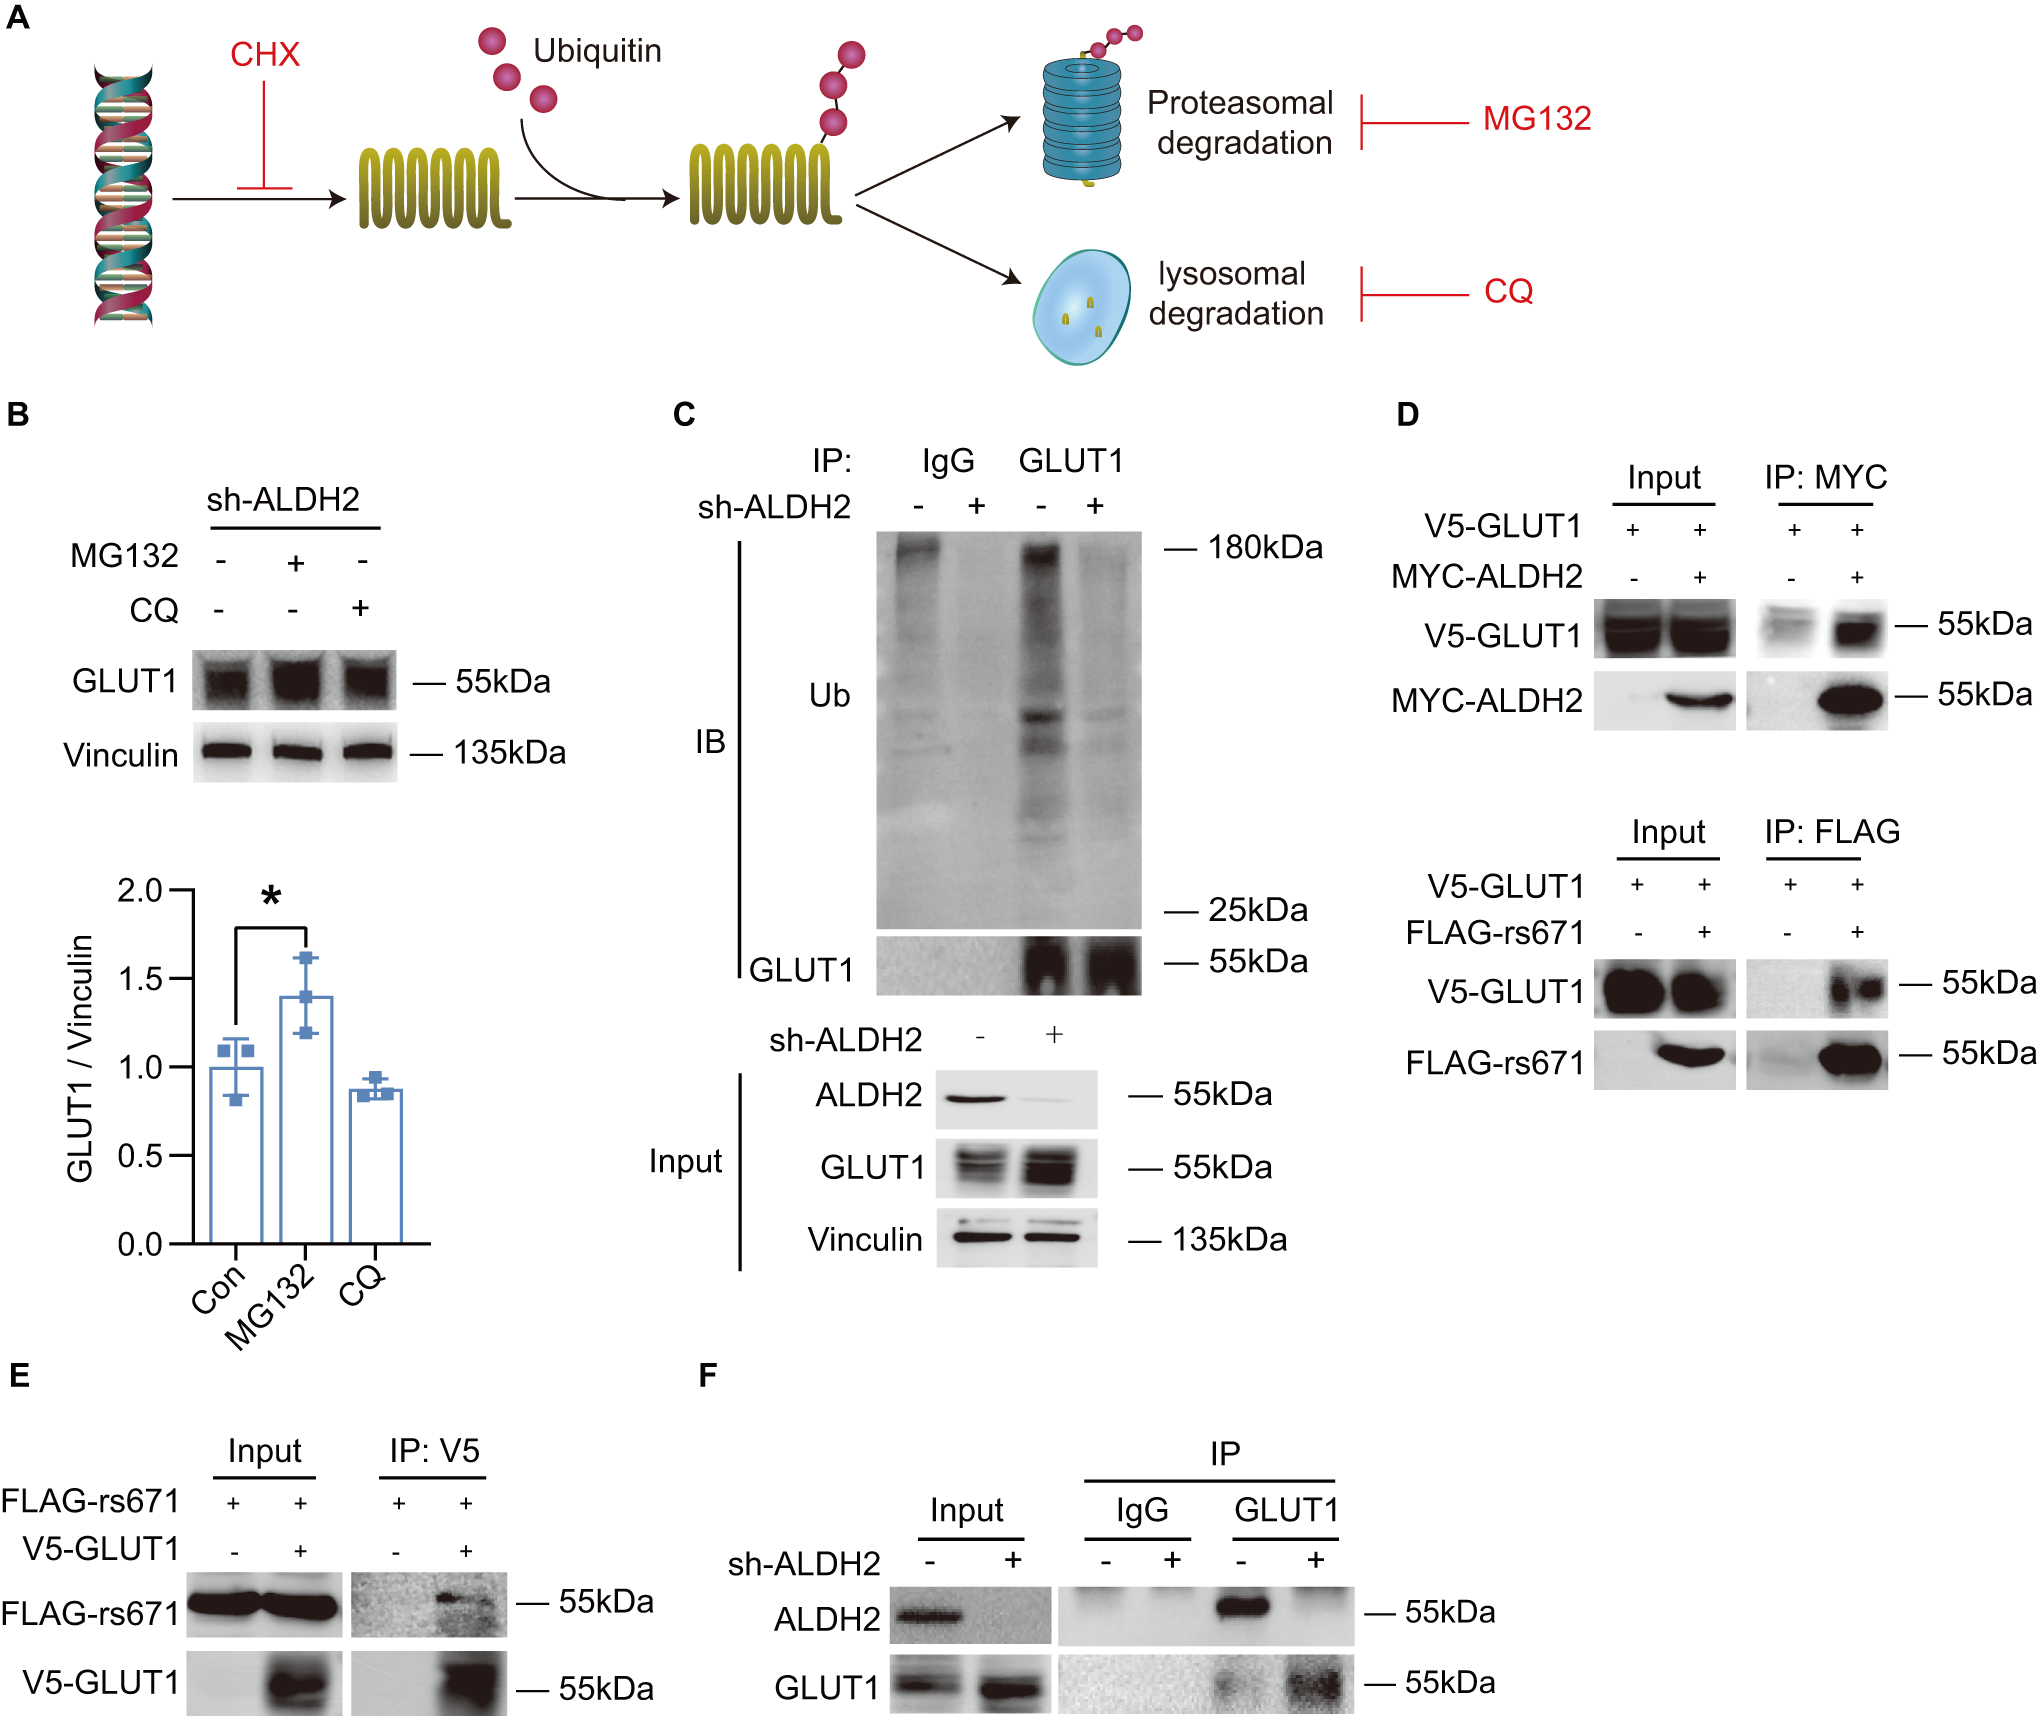


**Supplemental Figure 4. ALDH2 promotes GLUT1 ubiquitination through direct protein–protein interaction.**

**(A)** Schematic illustration of major cellular protein degradation pathways, including proteasomal and lysosomal routes. **(B)** Representatives immunoblot (top) and quantification (bottom) of GLUT1 protein levels in LPC-H12 cells treated with cycloheximide (CHX) following ALDH2 knockdown, with or without MG132 (10 μM) or chloroquine (CQ, 20 μM) for 6 hours. **(C)** Endogenous ubiquitination of GLUT1 in LPC-H12 cells with or without ALDH2 knockdown, assessed by immunoprecipitation using an anti-GLUT1 antibody. **(D)** Co-IP of MYC-tagged ALDH2 and V5-tagged GLUT1 in 293T cells. **(E)** Co-IP of V5-tagged GLUT1 with Flag-tagged ALDH2 rs671 in 293T cells. **(F)** Co-IP of endogenous GLUT1 and ALDH2 in LPC-H12 cells. Statistical comparisons were performed using a two-tailed Student’s t test. Data are presented as mean ± SD. *p < 0.05.


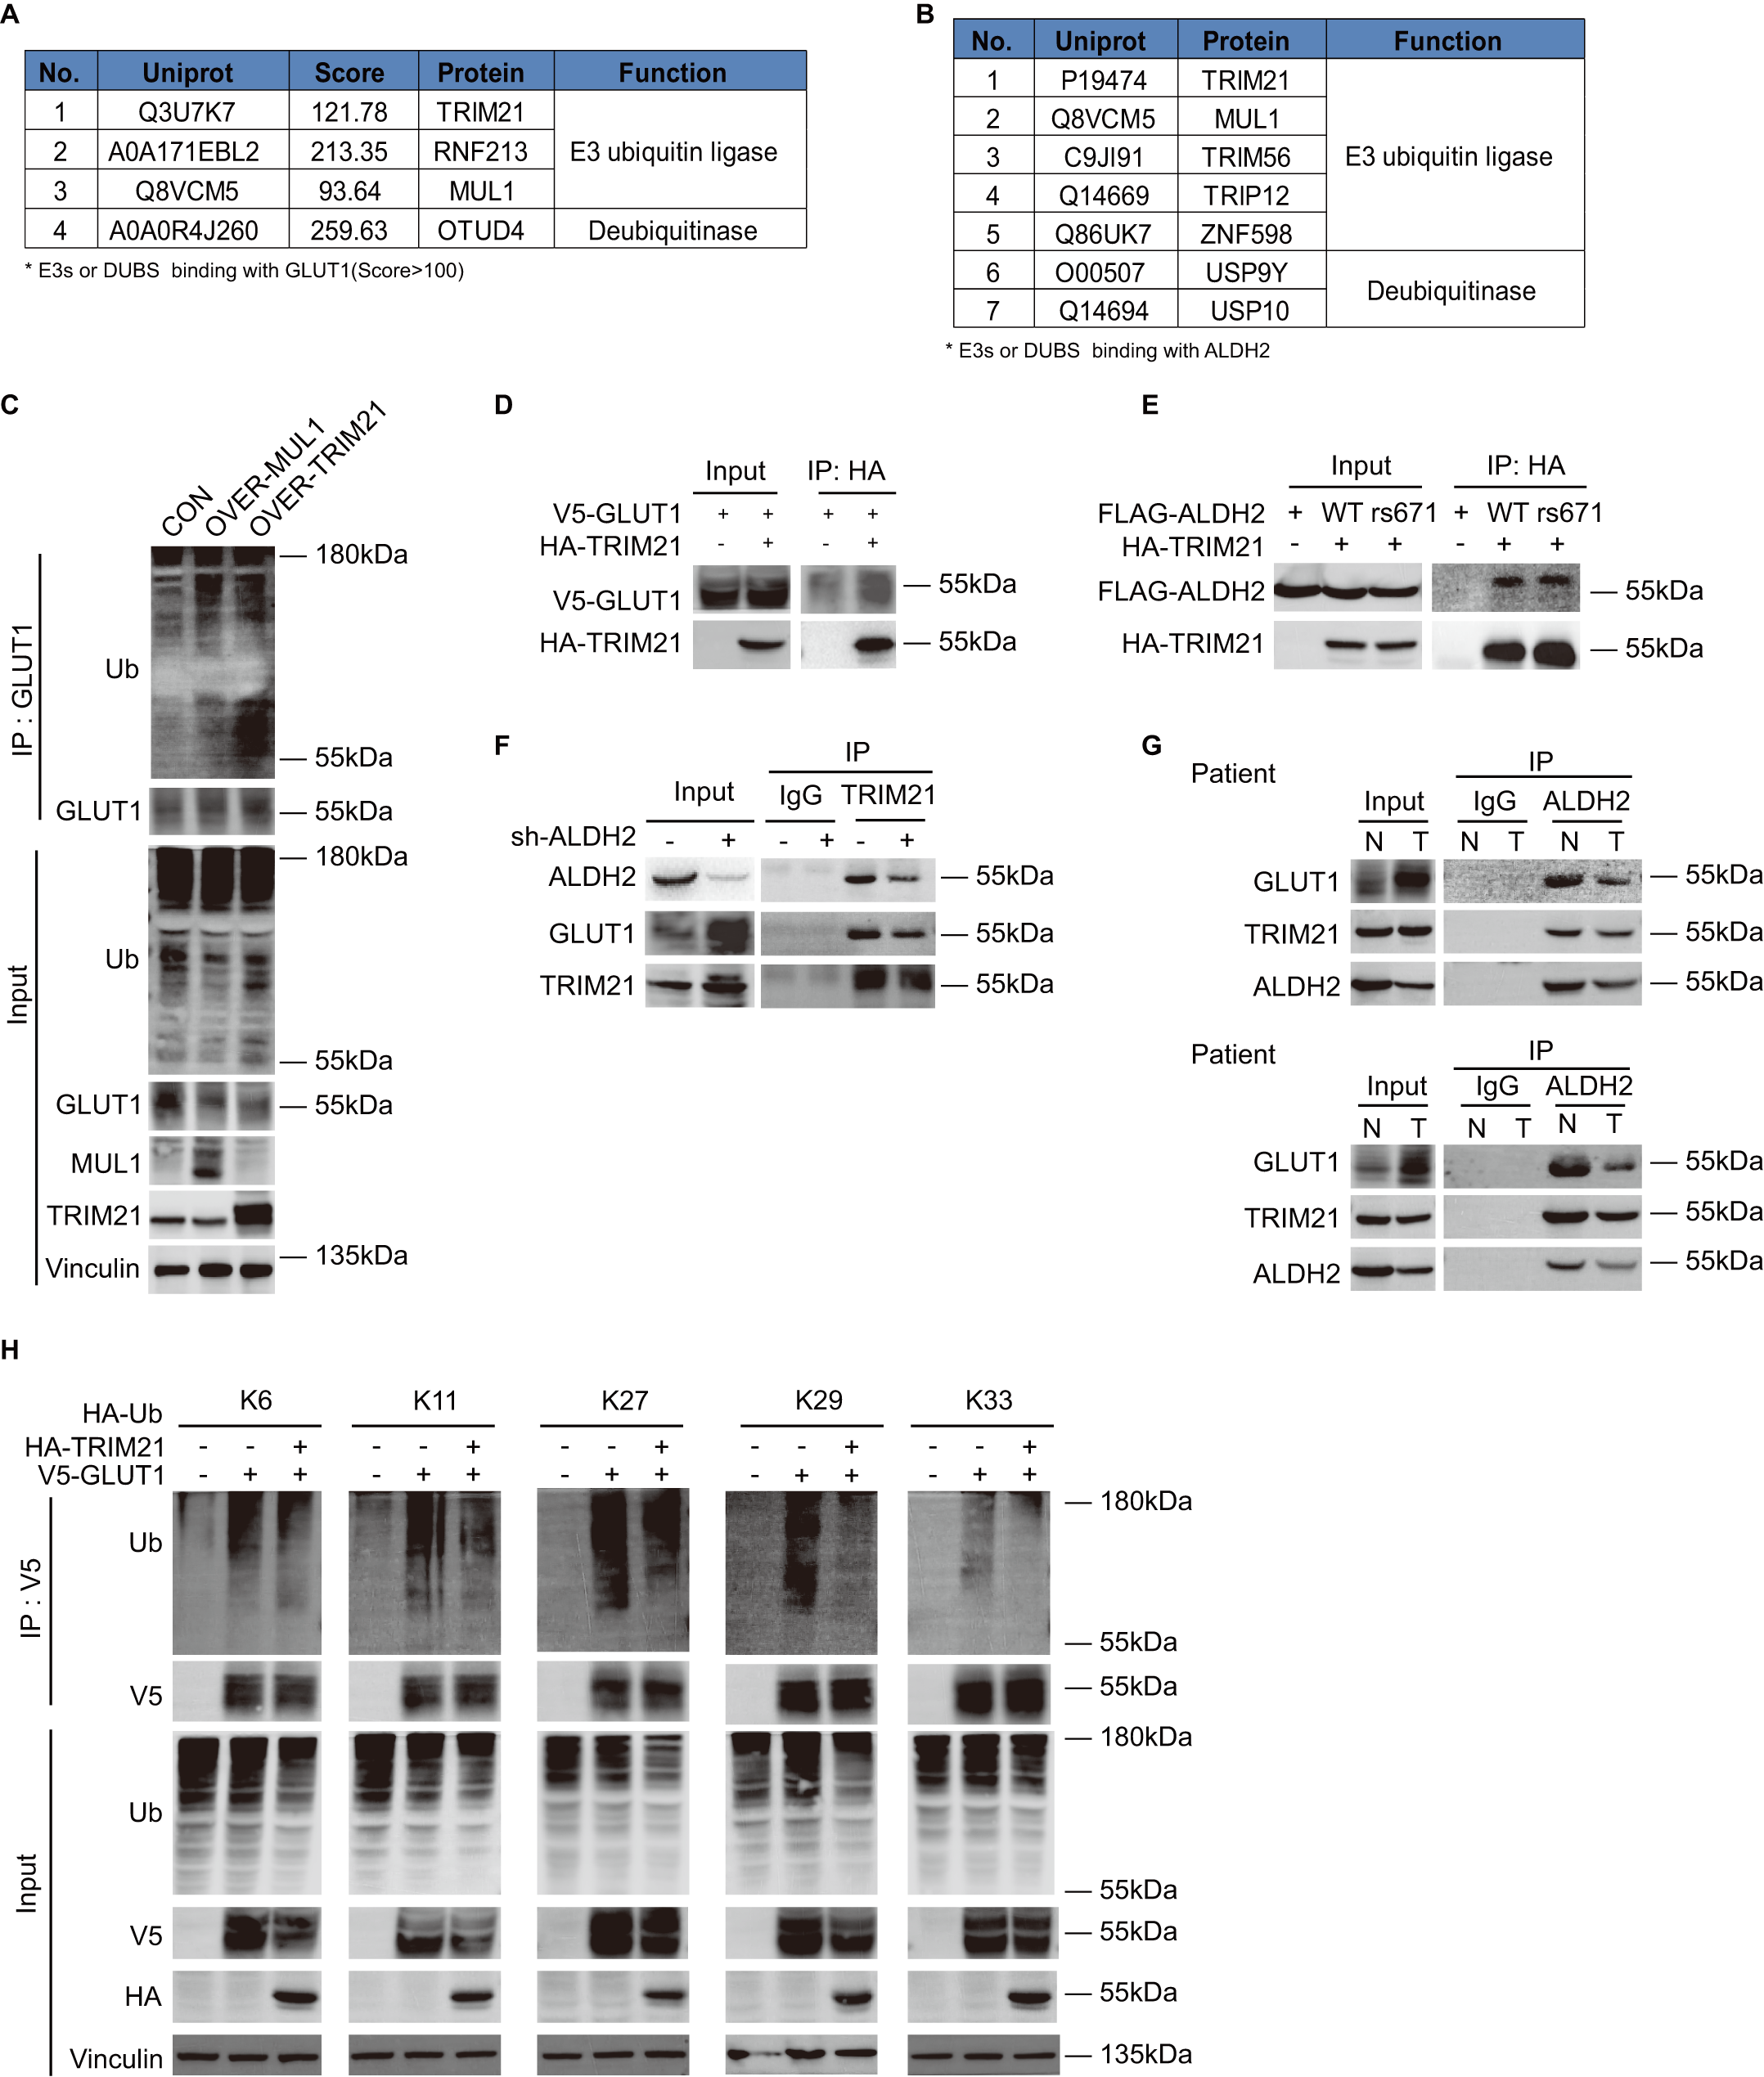


**Supplemental Figure 5. TRIM21 is identified as the primary E3 ligase linking ALDH2 to GLUT1 K48 ubiquitination**

**(A–B)** Mass spectrometry (MS) analysis of proteins co-immunoprecipitated with GLUT1 (A) or ALDH2 (B), identifying candidate E3 ligases and deubiquitinases (DUBs). **(C)** Ubiquitination assay in LPC-H12 cells overexpressing candidate E3 ligases. Ubiquitinated GLUT1 was detected by IP using an anti-GLUT1 antibody following MG132 treatment (10 μM, 6 h). **(D)** Co-immunoprecipitation assay assessing the interaction between TRIM21 and GLUT1 in 293T cells co-transfected with HA-tagged TRIM21 and V5-tagged GLUT1. **(E)** Co-immunoprecipitation assay examining the interaction between TRIM21 and either wild-type or rs671 ALDH2 in 293T cells co-transfected with HA-tagged TRIM21, FLAG-tagged ALDH2, or FLAG-tagged rs671 variant. **(F)** Endogenous ALDH2–TRIM21–GLUT1 complex was assessed by co-immunoprecipitation in LPC-H12 cells. **(G)** Endogenous co-immunoprecipitation of ALDH2, TRIM21, and GLUT1 in paired tumor and adjacent non-tumor tissues from HCC patients. **(H)** Ubiquitination assays in 293T cells transfected with V5-tagged GLUT1, HA-tagged TRIM21, and HA-tagged ubiquitin constructs carrying individual lysine mutations (K6, K11, K27, K29, or K33). Cells were treated with MG132 (10 μM, 6 h) before harvest.

**
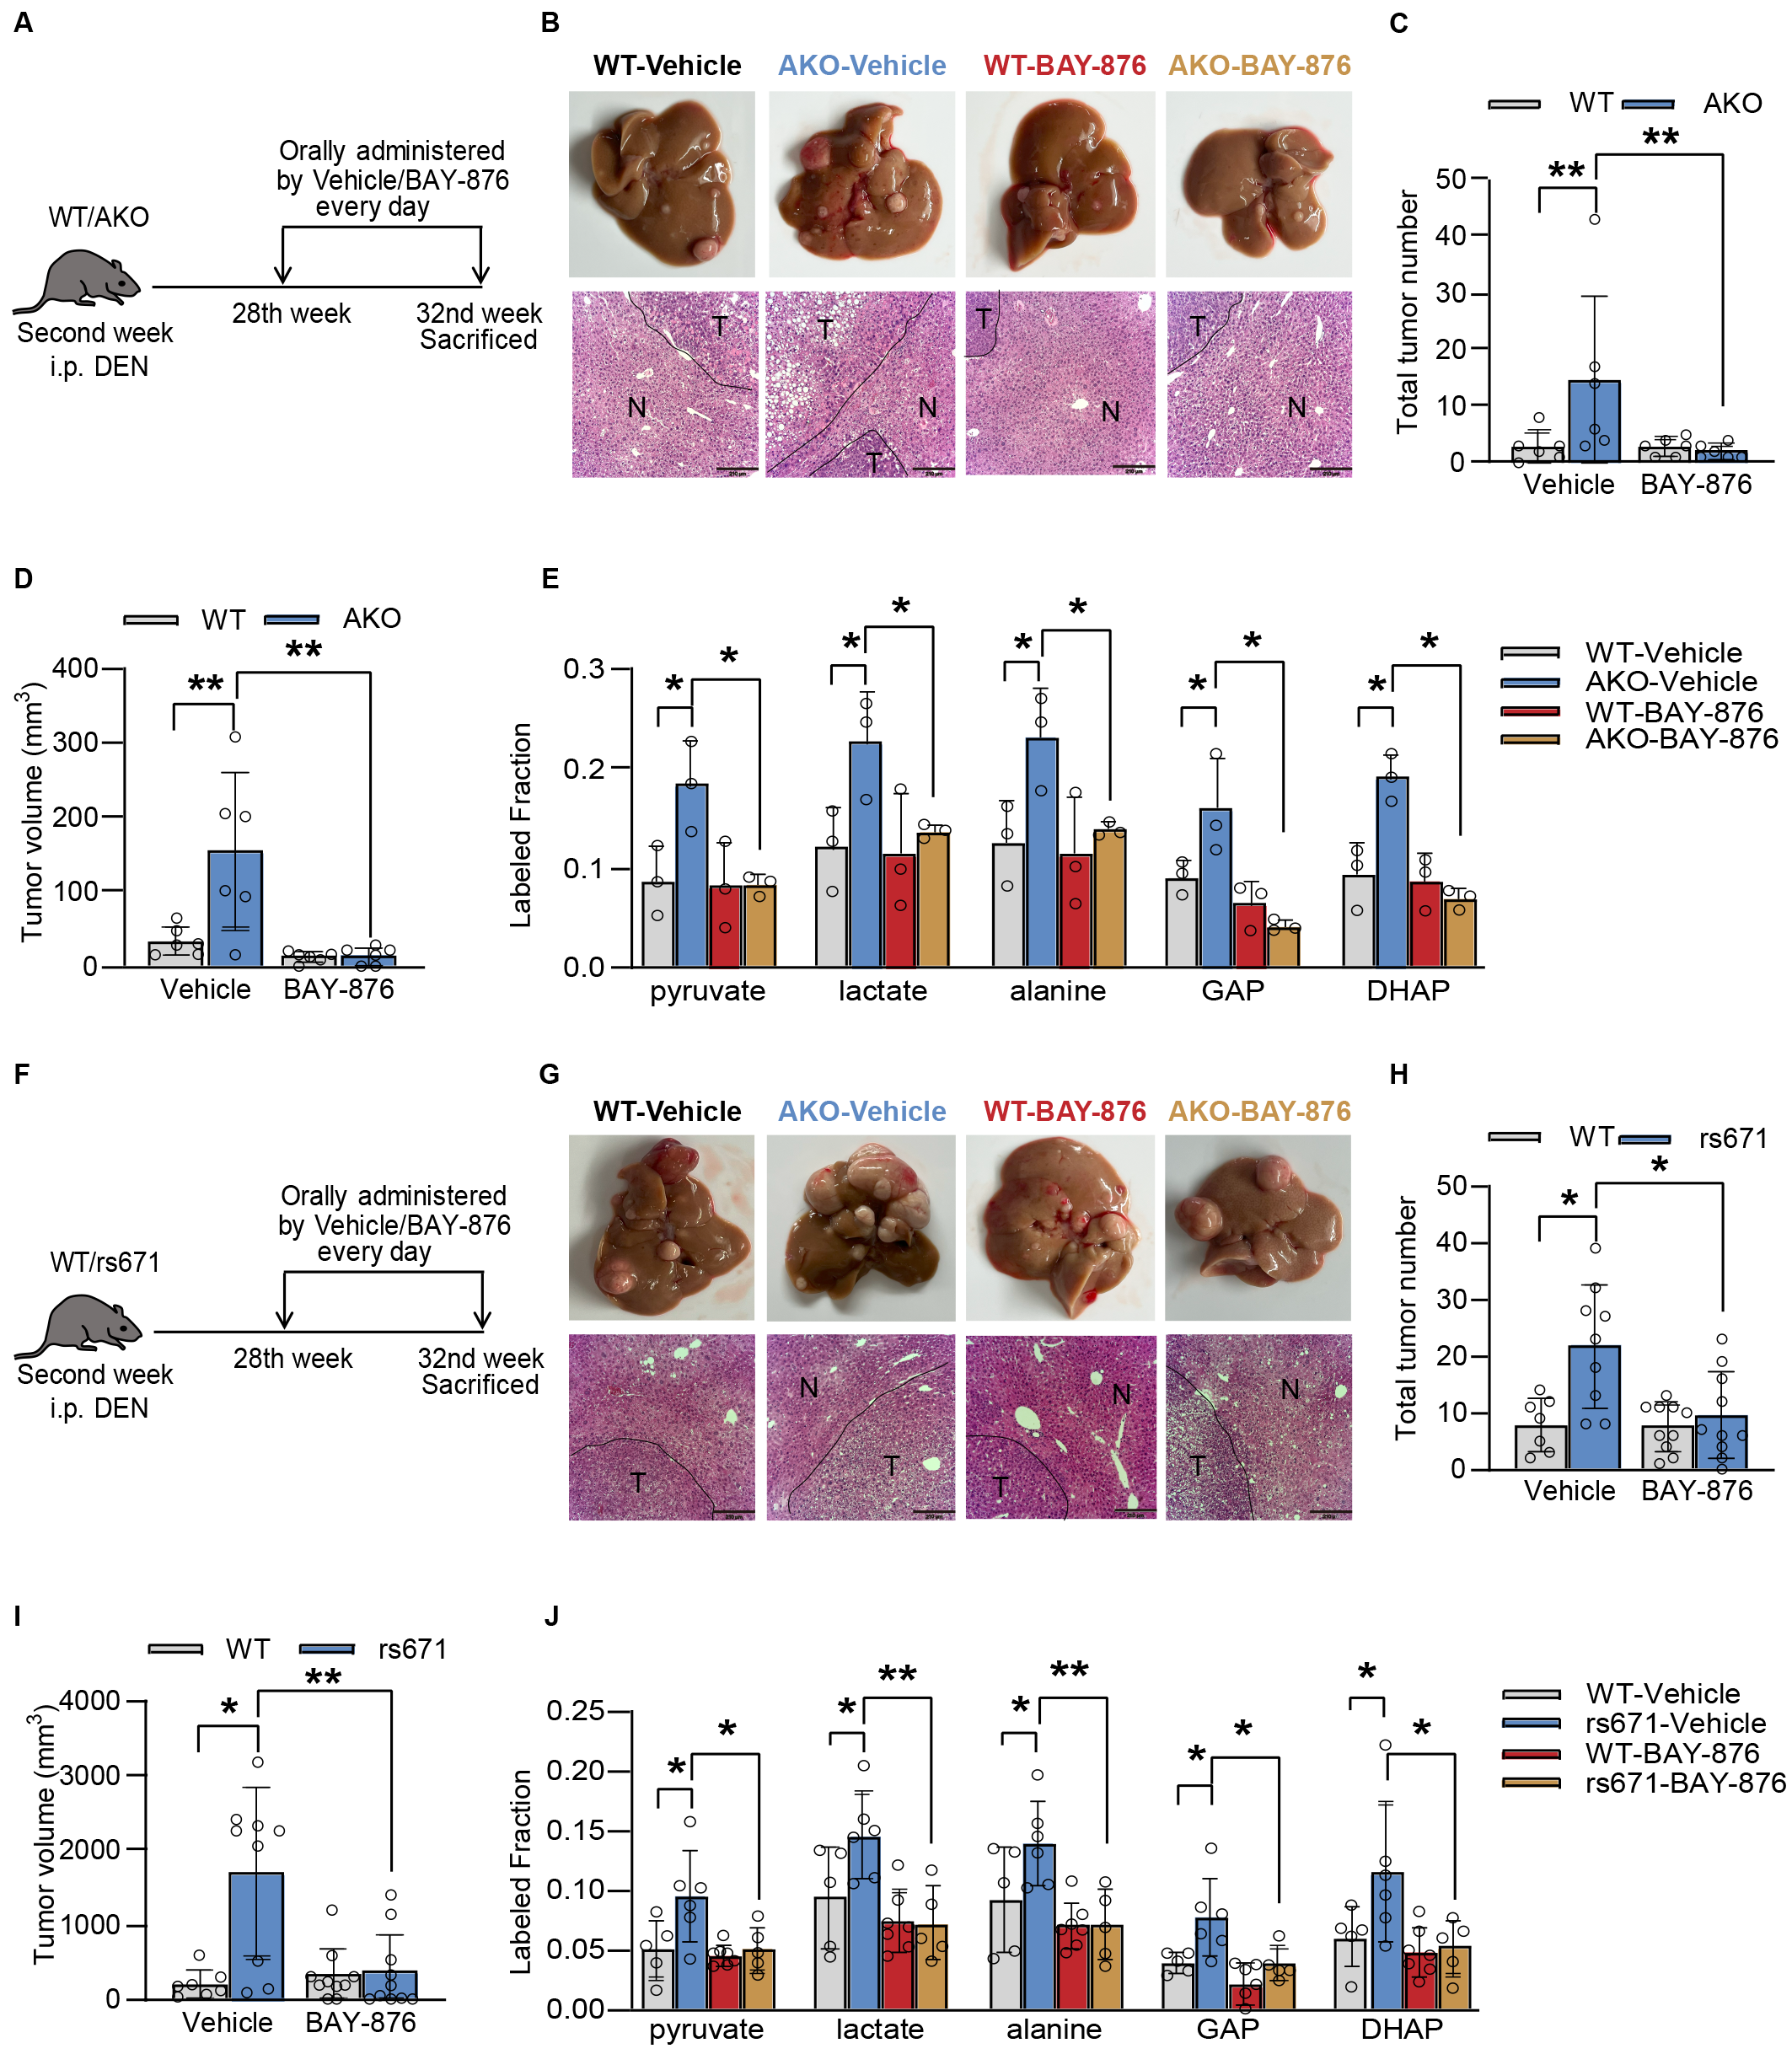
**

**Supplemental Figure 6. Pharmacological inhibition of GLUT1 suppresses ALDH2 deficiency–driven hepatocarcinogenesis in the DEN-induced mouse model**

**(A)** Schematic representation of the experimental design in wild-type (WT) and ALDH2-knockout (AKO) mice subjected to DEN-induced hepatocarcinogenesis. Mice received daily oral administration of vehicle or BAY-876 (5 mg/kg) starting at postnatal week 28 and were sacrificed at week 32. **(B)** Representative images of livers and H&E staining tumor sections from WT and AKO mice. Scale bar: 210 μm; N, normal; T, tumor. **(C-D)** Quantification of visible tumor number and total tumor volume on liver surface in WT and AKO groups (n=6 per group) **(E)** Fractional enrichment of glycolytic metabolites derived from [U-¹³C₆]-glucose in liver tissues from WT and AKO mice. **(F)** Schematic of the experimental workflow in WT and ALDH2 rs671 knock-in mice following DEN induction and BAY-876 treatment. **(G)** Representative liver images and H&E staining from WT and rs671 mice. Scale bar, 210 μm. N, normal; T, tumor. **(H, I)** Quantification of tumor volume and visible tumor number in WT and rs671 groups (n = 7 in WT-vehicle, n = 9 in rs671-vehicle, n = 10 in WT–BAY-876, and n = 10 in rs671–BAY-876 groups). **(J)** Fractional labeling of glycolytic metabolites from [U-¹³C₆]-glucose in liver tissues (n = 5 in WT-vehicle, n = 6 in rs671-vehicle, n = 7 in WT–BAY-876, and n = 5 in rs671–BAY-876 groups). Statistical comparisons were performed using one-way ANOVA. All data are presented as mean ± SD.*p < 0.05, **p < 0.01.


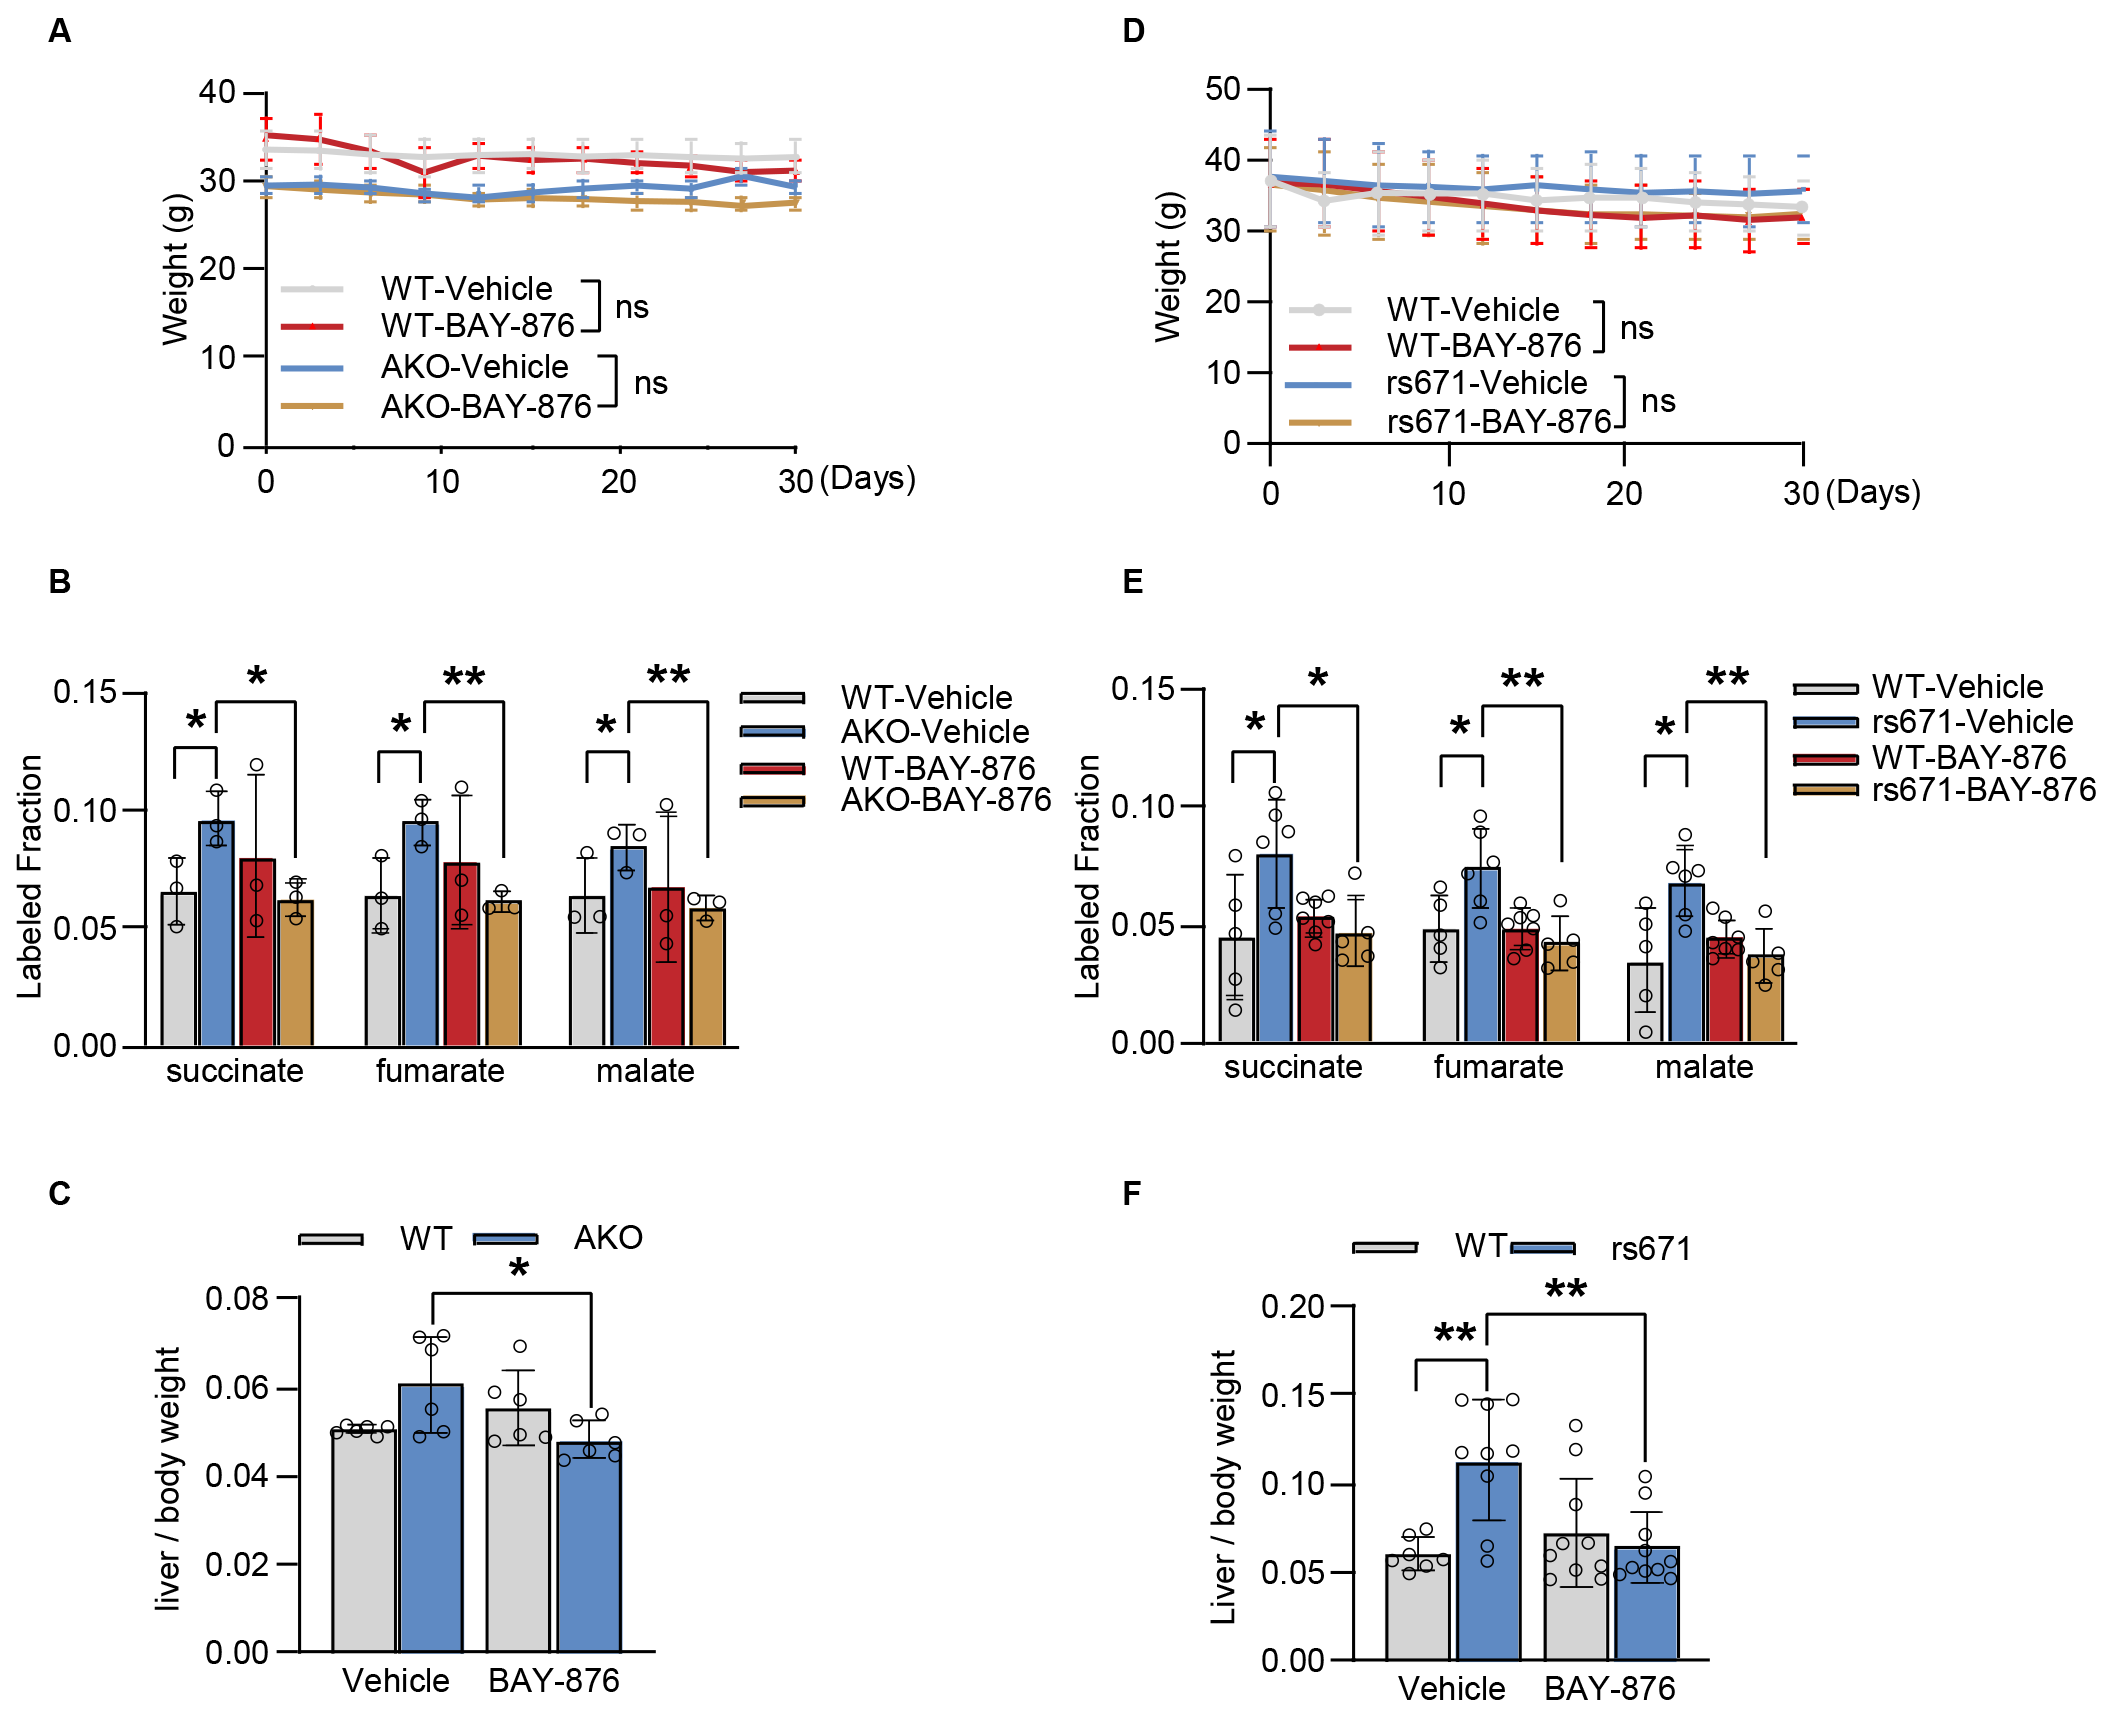


**Supplemental Figure 7. Effects of GLUT1 inhibition on body weight, liver mass, and TCA cycle metabolism in DEN-treated A mice model. (A)** Body weight measurements in WT and AKO mice following treatment with BAY-876 (n=6 per group). **(B)** Fractional enrichment of TCA cycle intermediates derived from [U-¹³C₆]-glucose in liver tissues from WT and AKO mice (n = 3 per group). **(C)** Liver-to-body weight ratios in WT and AKO mice. **(D)** Body weight measurements in WT and rs671 mice after treatment with BAY-876 (n=7 in WT-vehicle, n=9 in rs671-vehicle, n=10 in WT-BAY-876, and n=10 in rs671-BAY-876 groups). **(E)** Fractional labeling of TCA cycle metabolites from [U-¹³C₆]-glucose in liver tissues of WT and rs671 mice (n = 5 in WT-vehicle, n = 6 in rs671-vehicle, n = 7 in WT–BAY-876, and n = 5 in rs671–BAY-876 groups). **(F)** Liver-to-body weight ratios in WT and rs671 mice. Statistical comparisons were performed using one-way ANOVA. All data are presented as mean ± SD.**p* < 0.05, ***p* < 0.01.
